# Supplementary material for: Lymphatic Vascular Response to Acute Inflammation
Source: PubMed Central journal article supplement (PMC3785427; doi:10.1371/journal.pone.0076078), 2013-09-27
Supplement: pone.0076078.s002.pdf [file pone.0076078.s002.pdf]

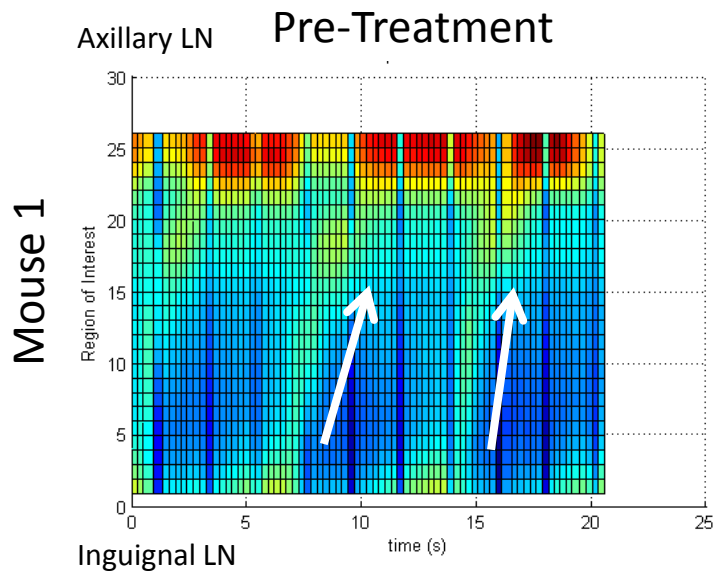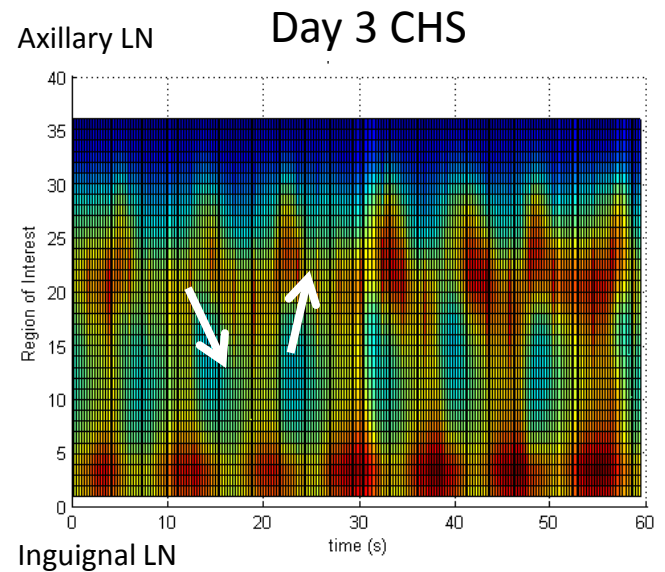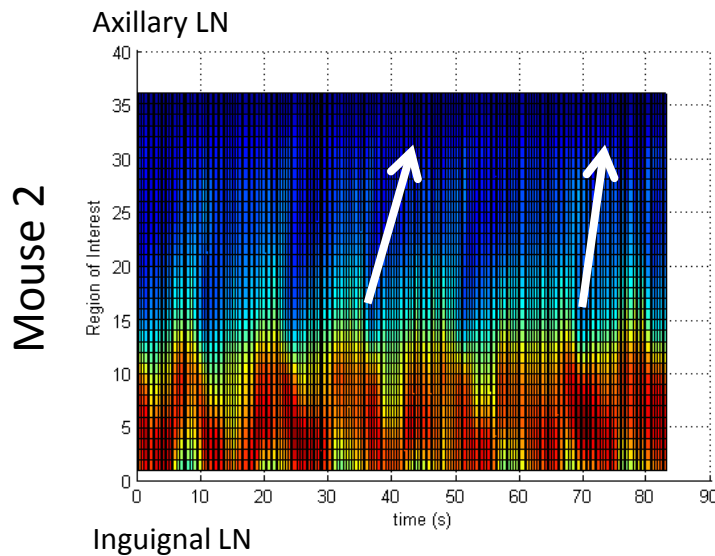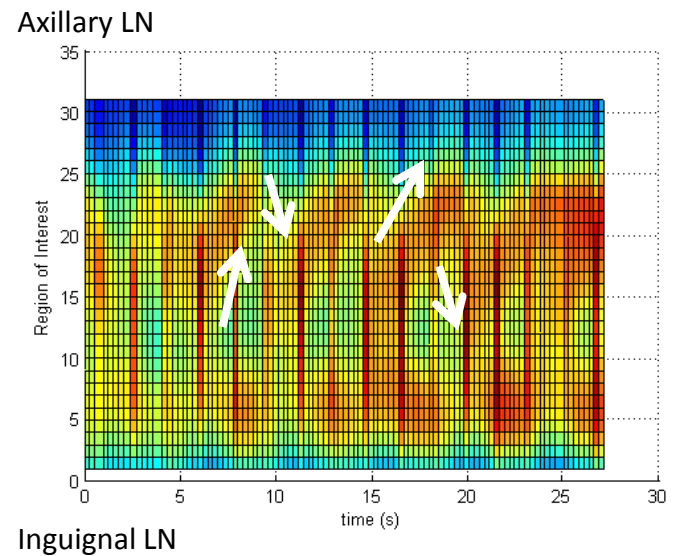

**Figure S2**  
**Spatio temporal plots from multiple animals shows lymphatic backflow in CHS** Plots showing fluorescence intensity along a lymphatic vessel from the inguinal LN to the Axillary LN indicated loss of effective flow at day 3 post-CHS. The plots are from two animals pre-treatment and at day 3 post-CHS. The arrows indicate the direction of the intensity peaks. There is a change in the direction of the intensity peak from always having a forward motion (inguinal LN to the axillary LN) in the pre-treated animals to both forward and backward flow (axillary LN to inguinal LN) in the treated animals. These data are indicative of a change in the effectiveness of the lymphatic flow.
