# Supplementary material for: Lymphatic Vascular Response to Acute Inflammation
Source: PubMed Central journal article supplement (PMC3785427; doi:10.1371/journal.pone.0076078), 2013-09-27
Supplement: pone.0076078.s003.pdf [file pone.0076078.s003.pdf]

| Analyte        | normal               |          | Day 3                |          | Day 7                |          | ANOVA    |          | T test value (corrected)    |                             |                       |
|----------------|----------------------|----------|----------------------|----------|----------------------|----------|----------|----------|-----------------------------|-----------------------------|-----------------------|
|                | ratio to non-treated | std      | ratio to non-treated | std      | ratio to non-treated | std      | P value  | FDR      | pvalue non-treated vs Day 3 | pvalue non-treated vs Day 7 | pvalue Day 3 vs Day 7 |
| Angiopoietin-2 | 1                    | 0.396402 | 2.171569             | 0.675327 | 0.736753             | 0.356947 | 7.92E-05 | 3.06E-04 | 6.80E-04                    | 3.01E-01                    | 8.50E-05              |
| G-CSF          | 1                    | 0.824286 | 18.41181             | 11.67401 | 0.856426             | 1.453234 | 7.52E-05 | 3.06E-04 | 1.80E-04                    | 9.65E-01                    | 1.80E-04              |
| sFASL          | 1                    | 0.33119  | 1.277631             | 0.109582 | 0.89478              | 0.494639 | 3.24E-01 | 4.37E-01 | 5.80E-01                    | 6.80E-01                    | 4.70E-01              |
| sALK-1         | 1                    | 0.199019 | 1.6274               | 0.22789  | 0.950631             | 0.367444 | 6.10E-04 | 1.65E-03 | 1.74E-03                    | 7.40E-01                    | 9.80E-04              |
| Amphiregulin   | 1                    | 0.788953 | 51.31338             | 25.30838 | 1.57274              | 0.822286 | 1.84E-06 | 1.65E-05 | 5.70E-06                    | 9.30E-01                    | 5.70E-06              |
| Leptin         | 1                    | 0.250236 | 0.791878             | 0.604361 | 0.799216             | 1.039397 | 8.38E-01 | 8.70E-01 | 1.00E+00                    | 1.00E+00                    | 1.00E+00              |
| IL-1 $\beta$   | 1                    | 1.033523 | 11.84544             | 19.41941 | 0.984881             | 1.76484  | 1.22E-01 | 2.53E-01 | 2.00E-01                    | 1.00E+00                    | 2.00E-01              |
| Betacellulin   | 1                    | 1.133066 | 1.721703             | 0.499555 | 0.999828             | 0.933847 | 4.68E-01 | 5.49E-01 | 8.50E-01                    | 1.00E+00                    | 8.50E-01              |
| EGF            | 1                    | 0.364891 | 1.044657             | 0.3819   | 0.71322              | 0.527662 | 3.16E-01 | 4.37E-01 | 8.60E-01                    | 5.40E-01                    | 5.40E-01              |
| IL-6           | 1                    | 0.727628 | 0.856436             | 0.312478 | 0.478503             | 0.454364 | 1.75E-01 | 3.15E-01 | 6.30E-01                    | 2.20E-01                    | 4.10E-01              |
| Endoglin       | 1                    | 0.390743 | 1.35741              | 0.77241  | 0.877525             | 0.812619 | 4.37E-01 | 5.36E-01 | 7.30E-01                    | 7.30E-01                    | 6.40E-01              |
| Endothelin-1   | 1                    | 0.533426 | 1.678495             | 0.97778  | 0.564466             | 0.471047 | 2.17E-02 | 5.34E-02 | 1.69E-01                    | 2.24E-01                    | 1.90E-02              |
| FGF-2          | 1                    | 0.574912 | 1.538929             | 0.668173 | 0.907426             | 0.723659 | 2.05E-01 | 3.47E-01 | 3.20E-01                    | 7.90E-01                    | 2.80E-01              |
| Follistatin    | 1                    | 0.96564  | 0.718267             | 0.270364 | 0.406391             | 0.461321 | 2.30E-01 | 3.66E-01 | 7.60E-01                    | 2.70E-01                    | 7.60E-01              |
| HGF            | 1                    | 0.359635 | 5.021043             | 2.482686 | 1.565813             | 1.457815 | 5.52E-04 | 1.65E-03 | 8.30E-04                    | 5.05E-01                    | 1.75E-03              |
| CD31/PECAM     | 1                    | 0.512695 | 1.503677             | 0.884369 | 0.891083             | 1.008078 | 3.88E-01 | 4.99E-01 | 5.90E-01                    | 8.00E-01                    | 5.80E-01              |
| IL-17          | 1                    | 0.583606 | 2.077666             | 1.237901 | 1.483312             | 2.297605 | 4.98E-01 | 5.61E-01 | 7.30E-01                    | 1.00E+00                    | 1.00E+00              |
| PLGF-2         | 1                    | 0.335326 | 6.267112             | 3.102365 | 1.044006             | 0.899691 | 3.15E-05 | 2.13E-04 | 8.40E-05                    | 9.60E-01                    | 8.40E-05              |
| KC/CXCL17      | 1                    | 0.911678 | 59.2782              | 42.92975 | 1.248528             | 1.72756  | 2.06E-04 | 6.95E-04 | 4.90E-04                    | 9.83E-01                    | 4.90E-04              |
| MCP-1          | 1                    | 1.146953 | 39.97789             | 55.14014 | 1.125141             | 0.912898 | 4.09E-02 | 9.20E-02 | 7.10E-02                    | 9.93E-01                    | 7.10E-02              |
| Prolactin      | 1                    | 0.309011 | 0.846046             | 0.701682 | 0.880403             | 0.711766 | 8.87E-01 | 8.87E-01 | 1.00E+00                    | 1.00E+00                    | 1.00E+00              |
| MIP-1 $\alpha$ | 1                    | 0.759153 | 314.7234             | 154.5348 | 9.117551             | 10.90567 | 1.57E-06 | 1.65E-05 | 5.40E-06                    | 8.50E-01                    | 5.40E-06              |
| SDF-1          | 1                    | 0.771958 | 0.777214             | 0.762641 | 0.443893             | 0.572841 | 3.22E-01 | 4.37E-01 | 7.80E-01                    | 4.20E-01                    | 7.80E-01              |
| VEGF-C         | 1                    | 0.366127 | 0.871763             | 0.101409 | 0.973124             | 0.262289 | 6.81E-01 | 7.36E-01 | 1.00E+00                    | 1.00E+00                    | 1.00E+00              |
| VEGF-D         | 1                    | 0.356655 | 1.264167             | 1.305295 | 0.525236             | 0.448378 | 1.42E-01 | 2.75E-01 | 5.50E-01                    | 3.40E-01                    | 1.80E-01              |
| VEGF-A         | 1                    | 0.521792 | 12.07162             | 6.943008 | 1.172247             | 1.061134 | 4.22E-05 | 2.28E-04 | 1.20E-04                    | 9.30E-01                    | 1.20E-04              |
| TNF- $\alpha$  | 1                    | 0.543073 | 121.4757             | 46.38383 | 1.781811             | 1.234545 | 3.50E-08 | 9.45E-07 | 1.20E-07                    | 9.50E-01                    | 1.20E-07              |

**Table S1**  
**Identification of pro-angiogenic.- lymphangiogenic factors in CHS.** Table shows the mean ratio  $\pm$ std of the concentration normalized to non-treated values (N>8) of all the analytes assayed and for which the data was reproducible in multiple assay. We also show the ANOVA results, the FDR for the ANOVA, and the corrected p-value for each comparison made.
